# Supplementary material for: Prognostic implications of preoperative anemia in urothelial carcinoma: A meta-analysis
Source: PLoS One. 2017 Feb 9;12(2):e0171701. doi: 10.1371/journal.pone.0171701 (PMC5300162; doi:10.1371/journal.pone.0171701)
Supplement: S4 File — (XLSX) [file pone.0171701.s004.XLSX]

## Sheet: subgroup analysis
Table 2. Results of the subgroup analysis of the prognostic significance of PA
	CSS							RFS							OS
Variables	No. Study	HR	95%CI	PZ	I2,%	Pheterogeneity	Model	No. Study	HR	95%CI	PZ	I2,%	Pheterogeneity	Model	No. Study	HR	95%CI	PZ	I2,%	Pheterogeneity	Model
Location
Upper Tract	5	2.1	1.57-2.81	<0.00001	38	0.17	Fixed	2	1.4	0.54-3.62	0.49	71	0.06	Random	0	-	-	-	-	-	-
Bladder	4	2.28	1.80-2.90	<0.00001	0	0.86	Fixed	5	1.9	1.56-2.31	<0.00001	16	0.32	Random	7	2.04	1.76-2.37	<0.00001	9	0.36	Fixed
Ethnic
Asian	3	2.41	1.62-3.57	<0.0001	0	0.44	Fixed	2	1.52	1.12-2.07	0.008	31	0.23	Fixed	3	1.76	1.35-2.30	<0.0001	6	0.34	Fixed
Caucasian	6	2.15	1.75-2.65	<0.00001	10	0.35	Fixed	5	2.02	1.68-2.45	<0.00001	11	0.35	Fixed	4	2.19	1.83-2.61	<0.00001	0	0.43	Fixed
No. of patients
>300	3	2.16	1.65-2.83	<0.00001	0	1	Fixed	2	1.69	1.13-2.51	0.01	67	0.08	Random	3	2.02	1.31-3.12	0.002	65	0.06	Random
≤300	6	2.25	1.74-2.89	<0.00001	32	0.19	Fixed	5	2.01	1.57-2.58	<0.00001	11	0.34	Random	4	1.98	1.55-2.52	<0.00001	0	0.83	Random
Stage
T3-4≤40%	4	1.94	1.36-2.79	0.0003	12	0.33	Fixed	3	1.79	1.04-3.06	0.03	55	0.11	Random	3	1.99	1.44-2.74	<0.0001	6	0.34	Fixed
T3-4>40%	5	2.31	1.86-2.87	<0.00001	0	0.5	Fixed	4	1.83	1.49-2.26	<0.00001	19	0.29	Random	4	2.06	1.74-2.43	<0.00001	33	0.22	Fixed
Grade
G3>50%	3	2.22	1.60-3.10	<0.00001	0	0.55	Random	3	1.71	1.34-2.18	<0.0001	30	0.24	Fixed	3	1.74	1.35-2.26	<0.0001	0	0.41	Fixed
G3≤50%	4	2.15	1.05-4.38	0.04	52	0.1	Random	1	0.77	0.30-2.00	0.6	-	-	Fixed	1	4.48	1.07-21.92	0.04	-	-	Fixed
LVI
LVI≤20%	4	2.5	1.82-3.43	<0.00001	0	0.63	Fixed	2	2.26	1.59-3.22	<0.00001	0	0.71	Fixed	2	1.91	1.37-2.64	0.0001	0	0.39	Fixed
LVI>20%	3	2.19	1.72-2.78	<0.00001	0	0.55	Fixed	4	1.84	1.53-2.21	<0.00001	19	0.29	Fixed	4	2.06	1.74-2.43	<0.00001	33	0.22	Fixed
CIS(+)
≤20%	4	2.18	1.55-3.05	<0.00001	0	0.52	Fixed	2	2.08	1.47-2.93	<0.0001	0	0.98	Fixed	2	2.47	1.51-4.06	0.0003	0	0.36	Random
>20%	2	2.29	1.74-3.01	<0.00001	0	0.39	Fixed	2	2.04	1.59-2.61	<0.00001	0	1	Fixed	3	1.96	1.46-2.64	<0.00001	55	0.11	Random
Follow-up Time
<50months	5	2.42	1.86-3.15	<0.00001	0	0.55	Fixed	3	2.06	1.55-2.75	<0.00001	0	1	Random	3	2.13	1.58-2.87	<0.00001	0	0.94	Random
≥50months	3	1.98	1.49-2.63	<0.00001	40	0.19	Fixed	4	1.7	1.20-2.41	0.003	61	0.05	Random	4	1.92	1.42-2.60	<0.0001	53	0.09	Random
End of Follow-up
after 2011	6	2.15	1.74-2.67	<0.00001	0	0.5	Fixed	3	1.91	1.49-2.45	<0.00001	47	0.15	Fixed	3	2.34	1.92-2.87	<0.00001	0	0.64	Fixed
before 2011	3	2.37	1.63-3.45	<0.00001	30	0.24	Fixed	4	1.84	1.49-2.28	<0.00001	34	0.21	Fixed	4	1.73	1.39-2.16	<0.00001	0	0.62	Fixed
